1 **Episodic memory deficits are associated with impaired insight in traumatic encephalopathy**  
2 **syndrome: Initial findings of the SNAP-CTE study**

3 **Rowena E. A. Mobbs<sup>1\*</sup>, Jennifer Batchelor<sup>2</sup>, Alessandra K. Teunisse<sup>2,3</sup>, Ellen Erskine<sup>2</sup>,**  
4 **Eamon Brown<sup>3</sup>, Joshua Hood<sup>2</sup>, Anthony E. Mobbs<sup>2</sup>, Clare L. Fraser<sup>4,5</sup>, Alan J Pearce<sup>6</sup>,**  
5 **Richard Stevenson<sup>2</sup>, Roy G Beran<sup>7,8,9</sup>, Anna Miskovic-Wheatley<sup>3</sup>, Karina Chan<sup>2</sup>, Alicia**  
6 **Ching Mun Foo<sup>2</sup>, Reidar P. Lystad<sup>10</sup>**

7 <sup>1</sup>Macquarie University Hospital, Department of Neurology, Macquarie University, New South  
8 Wales, Australia

9 <sup>2</sup>Department of Psychology, Faculty of Medicine, Health and Human Sciences, Macquarie  
10 University, New South Wales, Australia

11 <sup>3</sup>Department of Clinical Medicine, Faculty of Medicine, Health and Human Sciences, Macquarie  
12 University, Sydney, NSW, Australia.

13 <sup>4</sup>Department of Ophthalmology, Faculty of Medicine, Health and Human Sciences, Macquarie  
14 University, New South Wales, Australia

15 <sup>5</sup>Save Sight Institute, University of Sydney, Sydney, NSW, Australia.

16 <sup>6</sup>College of Science, Health and Engineering. La Trobe University, Melbourne, Australia

17 <sup>7</sup>University of New South Wales, Sydney, New South Wales, Australia

18 <sup>8</sup>Griffith University, Southport, Queensland, Australia

19 <sup>9</sup>Sechenov Moscow First State University, Moscow, Russia

20 <sup>10</sup>Australian Institute of Health Innovation, Macquarie University, New South Wales, Australia

21 **\* Corresponding Author**

22 **Email: [rowena.mobbs@mqhealth.org.au](mailto:rowena.mobbs@mqhealth.org.au)**

23

24           **Abstract**

25   Chronic traumatic encephalopathy (CTE) has been identified at post-mortem in Australian  
26   football codes players. Detailed and objective clinical and radiological characterization of  
27   patients at-risk of sporting and non-sporting repetitive concussive and subconcussive traumatic  
28   brain injury (RC/SCI) is important to our understanding of traumatic encephalopathy syndrome  
29   (TES) and CTE. This paper presents the initial findings of the symptomatology, neurocognitive,  
30   and pathophysiological changes in CTE (SNAP-CTE) study. A preliminary, retrospective, cohort  
31   study of 28 patients (25 males and 3 females) presenting with complaints of mood, behavioral,  
32   and cognitive decline, comprising TES, aged 24 to 78 years ( $M = 53$ ,  $SD = 15.3$ ) with at least 10  
33   years of exposure to RC/SCI (mostly through contact sport) and cognitive decline were  
34   examined including: demographics; duration of play; age of first exposure to RC/SCI; and  
35   neuropsychology. Participants performed significantly worse in tests of auditory, visual,  
36   immediate, and delayed memory compared to a normative sample. Those with absent insight,  
37   compared to those with preserved insight, had a larger discrepancy between predicted and actual  
38   auditory memory scores, and had more severe mood disturbances. Insight, a hallmark sign of  
39   dementia, was either absent or impaired in a significant proportion ( $M = 36.4\%$ ,  $95\% CI = 17.2\%$   
40   -  $59.3\%$ ) of the sample aged under 65, compared with normative epidemiological data. This  
41   indicates that RC/SCI may be associated with risk of an early onset dementia syndrome  
42   representing probably TES/CTE. CTE is increasingly of concern to the Australian community,  
43   and further research in this area is necessary. This retrospective preliminary study will form the  
44   basis of large, prospective, longitudinal cohort studies, assessing the natural history of TES/CTE  
45   in Australian athletes.

46 **Keywords:** Chronic traumatic encephalopathy, tauopathy, dementia, cognition, emotion,  
47 memory, behavior, decline.

48

## 49 **1 Introduction**

50 Patients with traumatic encephalopathy syndrome (TES) and the pathological correlate,  
51 chronic traumatic encephalopathy (CTE), experience a neurodegenerative disorder (1). As with  
52 other types of dementia, in which diagnostic tools are not definitive (2), TES requires  
53 verification at autopsy to confirm the presence of CTE (2,3). The pathognomic neuropathological  
54 lesion is the accumulation of hyperphosphorylated Tau in neurons and astrocytes, in an irregular  
55 distribution around blood vessels at the depths of sulci in the neocortex (4). While CTE has been  
56 mostly reported in American football players (5), it has also been found in other sports including  
57 soccer (6), professional wrestling, hockey (3) and in Australian-based football (7,8). However,  
58 the incidence and prevalence of a TES, as per criteria (1), and the association between  
59 concussion/subconcussion burden and TES or CTE is not yet evidenced in Australia. During life,  
60 these athletes typically experience concussive and subconcussive head trauma across different  
61 sports or non-sporting circumstances, which may overlap.

62 TES has been characterized to include cumulative head trauma beyond two years;  
63 correlating to progressive and delayed subjective and objective features; support by emotional  
64 dysregulation; behavioral changes; and motor disturbance, that are otherwise unaccounted for  
65 (1). The consideration of this relatively new differential subtype of dementia has not formed part  
66 of a traditional neuropathological examination at autopsy (9) nor have typical panels of comorbid  
67 cerebral pathology across longitudinal studies (10,11).

68           Although there is a clear need for neuropathological biomarkers to identify CTE, what is  
69   also needed is a clearer neuropsychological profile of this dementia. There is a growing body of  
70   literature investigating whether multiple concussive or subconcussive events contribute to long-  
71   term neuropsychological impairment in athletes (12,13). Studies assessing the prevalence of  
72   cognitive impairment indicate that clinically diagnosed mild cognitive impairment (MCI) is more  
73   frequent in contact-sport athletes than would be expected, according to population estimates (14)  
74   or when compared to age-matched, non-contact, sport controls (15). Survey data, from retired  
75   American football players, indicates that concussion history is associated with both clinically  
76   diagnosed MCI and subjective memory impairments (16). Self- and spouse-reports of  
77   impairments, consistent with MCI, suggest MCI may occur at a higher prevalence in former  
78   contact-sport athletes than would be expected by population estimates (17). This means that  
79   former players of contact related sports are more likely to show signs of MCI, compared with the  
80   general population. Such athletes also perceive themselves as having greater executive  
81   dysfunction, when compared to normative data (18) and age-matched non-contact sport athletes  
82   (19). This suggests some insight into the symptoms experienced. The literature remains  
83   equivocal as to whether these subjective concerns reflect objective cognitive impairments that  
84   can be detected on formalized neuropsychological measures.

85           Episodic memory, considered the encoding, retention, and active retrieval of specific  
86   contextual information, is influenced by MCI (20) and intelligence quotient (IQ) (21,22).  
87   Memory is supported by three processes: encoding (the intake and organization of information);  
88   consolidation (the storage of information); and retrieval (accessing the information) (23). A  
89   prominent study of sporting related RC/SCI (n = 35), as compared with single-impact head  
90   trauma (n = 35) or healthy controls (n = 20), found that both injury groups showed significant

91 consolidation and retrieval deficits, whereas the single-impact head trauma group showed greater  
92 difficulty encoding (23). Although, it is unclear which aspects of episodic memory deficits are  
93 related to CTE. Other studies have found that athletes with a history of concussion, compared to  
94 controls or athletes without concussion, perform worse on tasks of episodic memory (14,24–26).  
95 One study that compared retired football players with three or more concussions to those with  
96 fewer than three concussions found no difference in their performance on memory testing (20).  
97 However, the two groups did demonstrate different neural recruitment patterns, which suggested  
98 that the retired players with a history of three or more concussions may have functional  
99 inefficiencies in memory networks. Therefore, it is important to investigate all aspects of  
100 episodic memory including Auditory Memory Index, Visual Memory Index, Immediate Memory  
101 Index, and Delayed Memory Index in a cohort of retired athletes to determine which elements  
102 (namely encoding, consolidation, or retrieval) are impaired and how they differ from other types  
103 of dementia.

104 Many investigations have assessed the association between concussion history and  
105 cognitive decline to establish a dose-response frequency. It has been shown that reductions in  
106 executive functioning, episodic memory, and information processing occur in repetitive head  
107 trauma. Former athletes who sustained their last sports-related concussion in environments of  
108 potential subconcussive burden, over 30 years prior, have demonstrated significantly poorer  
109 performance on tasks of episodic memory and response inhibition (26) or significantly impaired  
110 performance in visuomotor reaction time, spatial working memory, associative learning, and  
111 intra-extra dimensional shift (27,28), compared to healthy former athletes with no history of  
112 concussion. More research is needed to determine if there is a dose-dependent effect of mild  
113 Traumatic Brain Injury (mTBI) and exposure to repetitive head trauma related to CTE.

114 As with other forms of dementia, impaired insight may be a key feature when considering  
115 a patient's risk of TES/CTE. Loss of insight is a lack of concern or unawareness of the  
116 consequences of symptoms and occurs independently of other psychological mechanisms of the  
117 denial of symptoms (29). Although a loss of insight might be indicative of frontotemporal  
118 dementia (29), it has also been reported in people with CTE (3,30,31).It is important to  
119 determine the extent of loss of insight in people with CTE and how this affects the progression of  
120 TES. A discrepancy between carer and patient reported number, type, or severity of symptoms,  
121 suggestive of lack of insight by patients into their illness, can have diagnostic and therapeutic  
122 implications (32,33).

123 These findings commence the work of the symptomatology, neurocognitive, and  
124 pathophysiological changes in CTE (SNAP-CTE) study, which assesses in-life clinical,  
125 radiological, neurophysiological, and neuropsychological characteristics across the spectrum of  
126 sporting and non-sporting repetitive head trauma in the Australian population. The larger aim of  
127 this project is to identify future biomarkers of disease, and to understand neuropathological and  
128 neuropsychological correlates. The current paper aims to determine the baseline  
129 neuropsychological characteristics of both active and retired contact and collision sporting  
130 participants extending upon the work by Pearce et al. (27,28) which was limited to cognitive  
131 outcomes. The primary variable of interest was the difference between IQ predicted and actual  
132 scores on the WMS-IV. It was hypothesized that differences between predicted and actual  
133 scores, in favor of IQ, would be both significant and clinically unusual. An additional aim was to  
134 investigate whether the participants' level of insight or alcohol use is associated with their  
135 cognitive ability and memory. It was hypothesized that insight, as obtained on collateral history  
136 from the main carer, is impaired in TES, and that insight is important in determining a

137 neurodegenerative picture as part of a systematic approach to the detection and diagnosis of  
138 younger-and older-onset dementia (34,35). It was also hypothesized that more severe episodic  
139 memory impairment would be associated with reduced insight.

140

## 141 **2 Method**

### 142 **2.1 Participants**

143 Participants were recruited from those referred from the general neurology clinic, sports  
144 medicine clinic, geriatric clinic, neurosurgical clinic, neuro-ophthalmology or ophthalmology  
145 clinic, or in general practice who self-identified as at risk for CTE. Participants were seen by a  
146 neurologist and neuropsychologist/psychologist. TES was defined as at least one core feature of  
147 impairment in cognition, mood, behavior, and at least two supportive features of impulsivity,  
148 anxiety, apathy, suicidality, paranoia, headache, motor signs, decline, delayed onset according to  
149 the Montinegro criteria (36) in the absence of other clinical and radiological syndromes that  
150 might account for their presentation, such as that of Alzheimer's disease, Lewy body dementia,  
151 frontotemporal dementia, Parkinsons plus disorders, and normopressure hydrocephalus.

152 The exclusion criteria were: aged less than 18 years; prior clinical diagnosis of  
153 radiologically apparent traumatic brain injury; previous neurosurgery, birth trauma, or serious  
154 malignancy; individuals who started engaging with collisions contact sport at an older age (>17  
155 years old); and if participants were unable to complete the Wechsler scales. The final sample  
156 consisted of 28 people (25 male, 3 female) aged 24 to 78 ( $M = 53.0$ ,  $SD = 15.3$ ) who were  
157 identified as at risk of sequelae of repeated head trauma. Demographic information relating to  
158 the participants and sporting history associated with history of concussion is included in

159

160 Table 1.

161



162 Table 1

163 *Demographics and sport associated with concussion data (n=28)*

| Characteristic                                         | n (%)     |
|--------------------------------------------------------|-----------|
| <b>Age Group</b>                                       |           |
| 24–34 Years                                            | 2 (7.1)   |
| 35–44 Years                                            | 8 (28.6)  |
| 45–54 Years                                            | 6 (21.4)  |
| 55–64 Years                                            | 6 (21.4)  |
| ≥ 65 Years                                             | 6 (21.4)  |
| Gender, n males                                        | 25 (89.3) |
| <b>Level of education</b>                              |           |
| < 10 Years                                             | 2 (7.1)   |
| School Certificate                                     | 8 (28.6)  |
| Higher School Certificate                              | 6 (21.4)  |
| 13–15 Years                                            | 7 (25.0)  |
| ≥ 15 Years                                             | 5 (17.9)  |
| <b>Sport/Event associated with concussion history*</b> |           |
| Rugby League/Union/AFL                                 | 17 (60.7) |
| Football/Soccer                                        | 3 (10.7)  |
| Boxing                                                 | 2 (7.1)   |
| Equestrian                                             | 2 (7.1)   |
| Mountain/BMX riding                                    | 2 (7.1)   |
| Other**                                                | 2 (7.1)   |
| Basketball                                             | 1 (3.6)   |
| Softball                                               | 1 (3.6)   |
| Ice Hockey                                             | 1 (3.6)   |
| Water Skiing                                           | 1 (3.6)   |
| Wrestling                                              | 1 (3.6)   |
| Judo                                                   | 1 (3.6)   |
| <b>Reported Concussions</b>                            |           |
| ≤ 9                                                    | 5 (17.9)  |
| 10–19                                                  | 8 (28.6)  |
| 20–29                                                  | 6 (21.4)  |
| ≥ 30                                                   | 9 (32.1)  |

164 \*6 participants were associated with 2 or more different sports

165 \*\* Domestic violence and army involvement

166

167 **2.2 Measures**

168 Participants were assessed using the battery of subtests from the Wechsler Adult  
169 Intelligence Scale-Fourth Edition (WAIS-IV) and Wechsler Memory Scale-Fourth Edition  
170 (WMS-IV). There was some variety in the combination of subtests administered to different  
171 participants from these test batteries. Patients who completed face to face testing were  
172 administered the full battery (n = 22), while those assessed via telehealth completed fewer  
173 measures (n = 6), in some cases, only verbal or visual Wechsler subtest depending on the  
174 technology used. As a result, there was some variation in the number of indices that were able to  
175 be analyzed across participants. Tests from the Verbal Comprehension Index and Working  
176 Memory Index of the WAIS-IV (both n = 18) and the Auditory Memory Index of the WMS-IV  
177 (n = 17) were most frequently included in administration. Tests from the Visual Working  
178 Memory index of the WMS-IV were least frequently included in administration (n = 5). The  
179 proportion of full indices that were able to be included in the analysis are detailed in

180 Table 2.

181

182 Table 2

183 *Index Scores Compared to the norm (M = 100)*

|         | Index | <i>n</i> | <i>M</i> | <i>SD</i> | <i>M diff.</i> | <i>t</i> | df | <i>p</i> |
|---------|-------|----------|----------|-----------|----------------|----------|----|----------|
| WAIS-IV | VCI   | 28       | 98.2     | 12.7      | -1.79          | -.743    | 27 | 0.464    |
|         | PRI   | 16       | 102.7    | 14.5      | 2.75           | .758     | 15 | 0.460    |
|         | WMI   | 28       | 99.8     | 15.7      | -.21           | -.072    | 27 | 0.943    |
|         | PSI   | 13       | 101.7    | 12.7      | 1.69           | .482     | 12 | 0.639    |
|         | FSIQ  | 12       | 103.8    | 14.4      | 3.83           | .922     | 11 | 0.376    |
|         | GAI   | 16       | 98.6     | 20.0      | -1.44          | -.287    | 15 | 0.778    |
| WMS-IV  | AMI   | 28       | 87.9     | 18.8      | -12.07         | -3.391   | 27 | 0.002    |
|         | VMI   | 12       | 92.1     | 15.9      | -7.92          | -1.726   | 11 | 0.112    |
|         | VWMI  | 5        | 96.4     | 7.2       | -3.60          | -1.124   | 4  | 0.324    |
|         | IMI   | 12       | 93.2     | 17.9      | -6.75          | -1.306   | 11 | 0.218    |
|         | DMI   | 12       | 89.7     | 21.4      | -10.33         | -1.669   | 11 | 0.123    |

193 *Note.* VCI = Verbal Comprehension Index; PRI = Perceptual Reasoning Index; WMI = Working Memory Index;  
 194 PSI = Processing Speed Index; FSIQ = Full Scale Intelligence Quotient; GAI = General Ability Index; AMI =  
 195 Auditory Memory Index; VMI = Visual Memory Index; VWMI = Visual Working Memory Index; IMI = Immediate  
 196 Memory Index; DMI = Delayed Memory Index.

197

198 Raw data, obtained from the WAIS-IV and WMS-IV, were analyzed using the Advanced  
 199 Clinical Solutions (ACS) (37) software package to produce index scores for both batteries. ACS  
 200 was also used to conduct predicted-difference discrepancy analyses of WMS-IV index scores,  
 201 using Verbal Comprehension Index or General Ability Index as the predictor. Discrepancies  
 202 which occurred in less than 10% of the normative sample were considered unusually large and  
 203 clinically meaningful (38).

204 A hallmark sign of the progress of neurodegenerative dementia is insight being either  
 205 impaired or absent (29). In this study, the history of symptoms, as reported by patient and their  
 206 accompanying, main carer during neurological consultation, were considered to reflect a measure  
 207 of insight. Partially reduced insight (namely impaired) was as defined by a disparity in the  
 208 reported symptomatology between patient and carer, while absent insight was the belief from the

209 patient that they had no neurological symptoms in contradiction to the carer, and confirmed on  
210 assessment. Emotional dysregulation characterized by irritability, easy anger, easy rage and  
211 pervasive low mood or anxiety, as well as cognitive decline, were qualitatively recorded.

### 212 **2.3 Procedure**

213 This study was approved by the human research ethics committee at Macquarie  
214 University (reference number: RM03100). All cognitive testing was conducted by clinical  
215 neuropsychological or post-graduate psychology students using standardized administration as  
216 per the test manuals via face-to-face assessment (n = 22) or via a telehealth program (n = 6) due  
217 to COVID-19 restrictions. Information about insight and alcohol use was recorded during  
218 consultation with a neurologist (RM), which in all cases preceded neuropsychological  
219 assessment. The examiners conducting the latter were blinded to information regarding insight  
220 and alcohol use.

### 221 **2.4 Statistical Analysis**

222 Using the data obtained from ACS, one-sample t-tests were conducted to compare the  
223 current sample to a normative sample for cognitive ability using SPSS software. For all analyses,  
224 a p-value <0.05 was considered significant. Descriptive statistics were used to outline potential  
225 significant traits of the cohort, such as reported number of concussions, education, and alcohol  
226 use. We compared the proportion of the cohort that was aged under 65 and showed signs of  
227 impaired or absent insight (which is consistent with dementia type disease) to the proportion of  
228 people living with dementia under the age of 65 as reported by the Australian Government (39).  
229 A non-parametric binomial test was used to calculate the 95% confidence interval to determine  
230 significance of incidence of early onset dementia in our sample defined as under the age of 65  
231 compared with the general population under the age of 65.

232 Due to the small amount of research and data within the area of concussion and  
233 TES/CTE, confounding variables are presently difficult to control. Alcohol use was thought to be  
234 potentially a confounding variable for TES/CTE and, within this sample, there were  
235 approximately 43% of participants that either presently or historically had alcohol use disorder or  
236 engaged in binge drinking behavior. Most of the sample (57%) did not show signs of alcohol use  
237 disorder nor engaged in binge drinking behavior, and approximately 86% had no active alcohol  
238 use disorder or binge pattern. Due to the cohort size, any statistically significant relationship  
239 between alcohol use and increased predilection to concussion and TES/CTE cannot be reliably  
240 assessed. Trends within the descriptive statistics of this cohort can indicate potential traits of  
241 interest for further investigation within this cohort and were reported.

### 242 **3 Results**

243 Nearly all of the participants included in the study participated in sport (as can be seen in  
244 Table 1) with most engaging in a sport that would have involved contact or collisions between  
245 athletes or head impact to the ground (e.g., Rugby League/Union/Australian Football League,  
246 soccer, and boxing). The potential for whiplash as a form of repeated head trauma was noted.  
247 Participation in these environments was for a total period of greater than 10 years, with the years  
248 of potential exposure ranging from 11 to 50 years (average age of contact sport commencement  
249 was  $M = 8.2$  years old  $SD = 3.5$  year). Years of education completed ranged from 8 to 22 years  
250 ( $M = 12.7$ ,  $SD = 3.1$ ).

#### 251 **3.1 Comparing the cohort to the norm for cognitive ability**

252 The scores obtained on the WAIS-IV and WMS-IV indices were compared to a  
253 normative sample ( $M = 100$ ,  $SD = 15$ ) using a one-sample t-test and these scores are presented in

254 Table 2. The average score on the WAIS-IV Verbal Comprehension Index was 98 and on the  
255 Working Memory Index average was 100. There were no statistically significant differences  
256 found between participants' performances on any measures of intelligence from the WAIS-IV  
257 compared to a normative sample. See Table 2 for the p-values. There was a statistically  
258 significant differences found between performances on one of the WMS-IV indices and the  
259 normative sample. Participants performed significantly worse on the Auditory Memory Index  
260 than the normative sample. There was no statistically significant difference between the groups'  
261 performances on the Visual Working Memory index. Correlations between the subscales and full  
262 scales are presented in

263 Table 3.

264



265 Table 3

*Correlations Between VCI, PRI, WMI, PSI, FSIQ and GAI*

|      |          | VCI    | PRI    | WMI    | PSI    | FSIQ   | GAI |
|------|----------|--------|--------|--------|--------|--------|-----|
| VCI  | <i>r</i> |        |        |        |        |        |     |
|      | <i>p</i> | -      |        |        |        |        |     |
|      | <i>n</i> |        |        |        |        |        |     |
| PRI  | <i>r</i> | .473   |        |        |        |        |     |
|      | <i>p</i> | .064   | -      |        |        |        |     |
|      | <i>n</i> | 16     |        |        |        |        |     |
| WMI  | <i>r</i> | .397*  | .626** |        |        |        |     |
|      | <i>p</i> | .037   | .010   | -      |        |        |     |
|      | <i>n</i> | 28     | 16     |        |        |        |     |
| PSI  | <i>r</i> | .602*  | .517   | .424   |        |        |     |
|      | <i>p</i> | .029   | .085   | .149   | -      |        |     |
|      | <i>n</i> | 13     | 12     | 13     |        |        |     |
| FSIQ | <i>r</i> | .873** | .782** | .697*  | .784** |        |     |
|      | <i>p</i> | .000   | .003   | .012   | .003   | -      |     |
|      | <i>n</i> | 12     | 12     | 12     | 12     |        |     |
| GAI  | <i>r</i> | .725** | .806** | .633** | .629*  | .941** |     |
|      | <i>p</i> | .001   | .000   | .009   | .028   | .000   | -   |
|      | <i>n</i> | 16     | 16     | 16     | 12     | 12     |     |

*Note.* VCI = Verbal Comprehension Index; PRI = Perceptual Reasoning Index; WMI = Working Memory Index; PSI = Processing Speed Index; FSIQ = Full Scale Intelligence Quotient; GAI = General Ability Index

\*. Correlation significant at the 0.05 level (2-tailed).

\*\*. Correlation significant at the 0.01 level (2-tailed).

266

267 Discrepancy analyses were conducted using the predicted-difference method with Verbal  
 268 Comprehension Index as the predictor variable for 10/18 (55.6%) of participants, and General  
 269 Ability Index as the predictor variable for 8/18 (44.4%) of participants. Results of the analysis  
 270 are presented in Table 4. There were statistically significant differences between predicted and

271 obtained scores on the Auditory Memory Index, Visual Memory Index, Immediate Memory  
272 Index, and Delayed Memory Index, with obtained scores on all those indices being significantly  
273 lower than predicted scores. There was no statistically significant difference between predicted  
274 and obtained scores on the Visual Working Memory index.

275 Table 4

276 *Predicted - Obtained Memory Index Scores*

| Index | <i>n</i> | Difference <i>M</i>              |                                 |               |                |          |
|-------|----------|----------------------------------|---------------------------------|---------------|----------------|----------|
|       |          | Predicted <i>M</i> ( <i>SD</i> ) | Observed <i>M</i> ( <i>SD</i> ) | ( <i>SD</i> ) | <i>t</i> value | <i>p</i> |
| AMI   | 28       | 99.9 (6.0)                       | 87.9 (18.8)                     | 12.0 (15.3)   | 4.149          | <0.001   |
| VMI   | 12       | 102.6 (7.9)                      | 92.1 (15.9)                     | 10.5 (10.2)   | 3.574          | 0.004    |
| VWMI  | 5        | 99.6 (5.3)                       | 96.4 (7.2)                      | 3.2 (5.4)     | 1.324          | 0.256    |
| IMI   | 12       | 102.8 (9.0)                      | 93.2 (17.9)                     | 9.59 (11.6)   | 2.857          | 0.016    |
| DMI   | 12       | 102.5 (8.1)                      | 89.7 (21.4)                     | 12.83 (14.7)  | 3.031          | 0.011    |

277 *Note.* AMI = Auditory Memory Index; VMI = Visual Memory Index; VWMI = Visual Working Memory Index; IMI  
278 = Immediate Memory Index; DMI = Delayed Memory Index.

279

280 A clinically significant difference, at the individual level, was defined as a disparity  
281 between predicted and observed scores that occurs in <10% of the normative sample (40). The  
282 proportion of individuals obtaining clinically significant differences across the WMS-IV indices  
283 are presented in

284

285 Table 5 for each of three cut-off values (41). The highest proportion of clinically significant cases  
286 was found on the Immediate Memory Index, with 41.7% of individuals obtaining a difference  
287 that occurs in less than 10% of the population.

288

289

290 Table 5

291 *Proportions of Cases Meeting Clinical Significance at Each of Three Base-Rate Categories for Predicted-*  
292 *Obtained Discrepancy Scores*

| Index | Base rates |           |          |
|-------|------------|-----------|----------|
|       | <1% (n)    | 1-5% (n)  | 5-10%(n) |
| AMI   | 17.8% (5)  | 7.1% (2)  | 0        |
| VMI   | 8.3% (1)   | 16.7% (2) | 8.3% (1) |
| VWMI  | 0          | 0         | 0        |
| IMI   | 0          | 33.3% (4) | 8.3% (1) |
| DMI   | 8.3% (1)   | 16.7% (2) | 8.3% (1) |

293 *Note.* AMI = Auditory Memory Index; VMI = Visual Memory Index; VWMI = Visual Working Memory Index; IMI = Immediate  
294 Memory Index; DMI = Delayed Memory Index.

295

### 296 **3.2 Insight capacity**

297 Out of the 28 participants, 64.3% (n=18) demonstrated preserved insight, while 35.7%  
298 participants had either impaired (n=6) or absent (n=4) insight. See

299

300 Table 6 for statistics of the cohort partitioned by level of insight. There appeared to be no  
301 significant difference in age at presentation ( $M$ , absent/impaired = 52 years, preserved = 53  
302 years), age at commencement of play ( $M$ , absent/impaired = 10 years, preserved = 8 years) or  
303 years of education ( $M$ , absent/impaired = 12 years, preserved = 13 years). There did appear to be  
304 a difference between years of exposure, with the absent/impaired cohort ( $M = 19$  years) showing  
305 fewer total years of exposure compared with the preserved cohort ( $M = 25$  years).

306

307

308 Table 6

309 Cohort characteristics by level of insight

|                                                       | <b>Absent/Impaired<br/>(n=10)</b> | <b>Preserved<br/>(n=18)</b> | <b>Odds Ratio<br/>(95%CI)</b> | <b>p-value</b> |
|-------------------------------------------------------|-----------------------------------|-----------------------------|-------------------------------|----------------|
| Age at presentation                                   | 52.7 (15.7)                       | 53.2 (15.5)                 | 1.00 (0.95, 1.06)             | 0.937          |
| Education (Years)                                     | 12.3 (3.7)                        | 12.9 (2.8)                  | 1.07 (0.83, 1.44)             | 0.595          |
| Age of Commencement                                   | 9.5 (3.5)                         | 7.5 (3.4)                   | 0.84 (0.65, 1.06)             | 0.154          |
| Total years exposure<br>contact                       | 19.2 (4.3)                        | 24.9 (9.8)                  | 1.12 (1.00, 1.33)             | 0.113          |
| Concussions                                           | 38.1 (36.4)                       | 27.8 (31.4)                 | 0.99 (0.97, 1.01)             | 0.425          |
| Verbal Comprehension<br>Index                         | 92.5 (12.6)                       | 101.4 (11.9)                | 1.07 (1.00, 1.16)             | 0.088          |
| Working Memory Index                                  | 100.7 (17.2)                      | 99.3 (15.4)                 | 0.99 (0.94, 1.05)             | 0.815          |
| Auditory Memory Index                                 | 83.8 (17.9)                       | 90.2 (19.5)                 | 1.02 (0.98, 1.07)             | 0.384          |
| Duration mood at<br>presentation (years)              | 9.0 (9.6)                         | 4.2 (7.6)                   | 0.94 (0.84, 1.03)             | 0.170          |
| Duration cognitive decline<br>at presentation (years) | 6.4 (7.2)                         | 2.9 (3.9)                   | 0.88 (0.69, 1.02)             | 0.161          |
| ACE-III / ACE-R at<br>presentation /100 <sup>1</sup>  | 87.4 (13.2)                       | 92.7 (4.4)                  | 1.09 (0.97, 1.31)             | 0.254          |

310 <sup>1</sup>ACE data missing for n=2 patients with absent/impaired insight and n=5 patients with preserved insight.

311

312 According to the Australian Institute of Health and Welfare, in 2019, approximately  
 313 0.13% (n=26,871) of Australians under 65 years were living with dementia (39,42). Within this  
 314 study's cohort who reported to a neurologist, 78.5% (n = 22, M = 47.1, S.D. = 11.2) were under  
 315 the age of 65. Within this subset, it was observed that 36.4% (n=8) of the cohort had either  
 316 impaired or absent insight. The binomial test indicated that the proportion of insight impairment  
 317 in our cohort was significantly higher than the prevalence of dementia among Australian aged  
 318 under 65 years (n=22, k=8, p<sub>k</sub>=0.13%, p < 0.001).

319 There were variations in the number of concussions sustained between the  
 320 absent/impaired (M = 38.1) and preserved (M = 27.8) insight. But when examining the median

321 number of concussions, due to the right-skew of the data, this difference reduces  
322 (absent/impaired Median = 20, preserved Median = 18.5). Due to the small sample size and the  
323 skew of the data it was unclear if there is a relationship just based on group averages. Working  
324 Memory Index did not appear to vary with insight ( $M$ , *absent/impaired* = 100.7 and  $M$ , *preserved*  
325 = 99.3). The Verbal Comprehension Index scores did appear to differ, where the absent/impaired  
326 group had lower average scores ( $M$  = 92.5) compared with the preserved group ( $M$  = 101.4) but  
327 this difference failed to reach significance. The absent/impaired group had lower Auditory  
328 Memory Index values ( $M$  = 83.8) compared with the preserved group ( $M$  = 90.2). This suggests  
329 that there could be a relationship between Auditory Memory Index and insight, whereby if  
330 auditory memory is impacted, so too will be insight.

331         Although not all groups had complete ACE-III (Addenbrooke's Cognitive Examinations)  
332 scores (43), the absent/impaired insight group had lower scores ( $M$  = 87.4) compared the  
333 preserved insight capacity group ( $M$  = 92.7). The duration of reported mood disturbance at  
334 presentation and duration of reported cognitive decline at presentation, was on average  
335 considerably higher in the absent/impaired group (cognition  $M$  = 6.4, mood  $M$  = 9.0) compared  
336 with the preserved group (cognition  $M$  = 2.9, mood  $M$  = 4.2). This showed that where the insight  
337 of participants was altered, participants were experiencing cognition and mood changes for twice  
338 as long before presentation.

### 339 **3.3 Alcohol use and cognitive ability**

340         Of the participants who completed the ACE-III scores ( $n$  = 21), the total average was  
341 low, being approximately 1.6 points higher than what is considered clinically significant for  
342 dementia ( $M$  = 90.6,  $SD$  = 8.9). See Table 7 for the ACE-III scores presented by group. It  
343 appeared that the non-drinking group out-performed their drinking counterparts, by showing

344 ACE-III scores relatively higher than what was considered clinically significant for dementia ( $M$   
345 = 92.2,  $SD = 4.3$ ) compared with the drinking group ( $M = 88.1$ ,  $SD = 13.5$ ). Table 7 also presents  
346 ACE-III scores subdivided into level of insight. The average ACE-III scores did not appear to  
347 differ between groups based on drinking status and level of insight except for those participants  
348 in the alcohol use disorder/binge drinking group who also had absent/impaired insight. Their  
349 average ACE-III scores were almost 20 points lower. However, there were only 2 participants in  
350 this group, suggesting that this may be a statistical artefact.

351 Table 7

352 *ACE-III scores presented by group*

|                                          | ACE-III M (SD) |                 | ACE-III M (SD) |
|------------------------------------------|----------------|-----------------|----------------|
| Non-Alcohol use disorder/binge drinking* | 92.2 (4.3)     | Preserved       | 91.7 (4.4)     |
|                                          |                | Insight (n = 7) |                |
|                                          |                | Absent/Impaired | 92.8 (4.5)     |
| Alcohol use disorder/binge drinking**    | 88.1 (13.5)    | Insight (n = 6) |                |
|                                          |                | Preserved       | 93.8 (4.6)     |
|                                          |                | Insight (n = 6) |                |
|                                          |                | Absent/Impaired | 71.0 (19.8)    |
|                                          |                | Insight (n = 2) |                |

353 \*16 participants in this group, but only 13 had complete ACE-III scores

354 \*\*12 participants in this group, but only 8 had complete ACE-III scores

355

## 356 4 Discussion

357 This was the first Australian study to assess the full spectrum of neuropsychological  
358 changes in a group of RC/SCI patients who met criteria for TES compared to normative data.  
359 There was support for the hypothesis, such that there were differences between the participants  
360 predicted IQ scores and actual IQ scores in various facets of episodic memory. Participants in  
361 this cohort performed significantly worse on measures of auditory, visual, immediate, and  
362 delayed memory compared to a normative sample. Previous alcohol use disorders may



363 exacerbate disease progression. Participants with impaired or absent insight had poorer verbal  
364 comprehension compared with the preserved insight group. Participants with absent or impaired  
365 insight had a larger discrepancy between predicted and actual scores on measures of auditory  
366 memory, compared to the other two groups. Mood disturbances were higher in the  
367 absent/impaired insight group compared to the preserved insight group. Participants with absent  
368 or impaired insight had less years of exposure but many more reported concussions, however the  
369 skew of the data meant that when examining the median number of reported concussions, this  
370 difference reduced. 78.5% of the sample were under the age of 65 yet reporting to a neurologist  
371 with concerns about their cognitive functioning. This is in stark contrast to the 0.1% of the  
372 Australian population who are currently suffering dementia and are under the age of 65 (39,42)  
373 suggesting that RC/SCI is associated with early onset dementia.

374         Although the severity of the behavioral and psychological disturbance was assessed  
375 qualitatively, rather than quantitatively, the cohort were consistently described to have  
376 impairment at first neurological consultation. Examples include: paranoid ideation, tendency of  
377 anger or rage, and cognitive impairment. Carers consistently reported troubles with irritability,  
378 social demeanor, anger, and physical rage accompanying memory impairment that were  
379 consistent with neuropsychological findings. These behavioural and psychological disturbances  
380 have been similarly described in the review by Montenegro et al. (36). Also, it is likely that  
381 alcohol use may be contributing to the neurodegenerative processes of RC/SCI, yet it is unclear  
382 if alcohol use exacerbates the progression of disease or if alcohol is a confounding variable.  
383 Further investigation is required to determine the true impact of alcohol use as related to RC/SCI  
384 and TES.

385           The value of this study is that it integrated measurement of intellect, working memory,  
386 and episodic memory. The study considered performance on tests of working memory and  
387 episodic memory relative to norms, rather than to a control group, which could have inherently  
388 differed in terms of intellect and by extension, memory. Performance on measures of encoding  
389 and retention were impaired relative to predictions derived from IQ. Performance on tests of  
390 working memory, which represents one aspect of attention, was not impaired. These findings  
391 extend recent reports (23,44) of an impairment of episodic memory in this population and  
392 contribute to the literature by demonstrating a significant disparity between the individual's IQ  
393 and memory (45). These findings cannot be explained by reference to poorly matched groups or  
394 other methodological limitations. The findings add to the growing body of literature indicating  
395 that this group experiences measurable and significant cognitive impairment.

396           While this study had a small sample, the cohort is suggestive of neurocognitive issues  
397 occurring much earlier than anticipated with a traditional dementia onset – including younger  
398 onset dementia (34). There was a 12-point difference, on average, in this group between the  
399 predicted Auditory Memory Index and the actual result. There appeared to be a trend that  
400 number of years of education, may have a protective effect on Auditory Memory Index scores.  
401 Given the small sample size, this should be investigated further.

402           There seemed to be no clear available demographic factors amongst the cohort that  
403 increased their likelihood of sustaining a concussion, except for a small positive trend regarding  
404 years of play. This relationship between has also been found by Rafferty et al. (46) who noted  
405 that playing more than 25 matches increased the likelihood of receiving a concussion. It did  
406 appear that alcohol use disorder, alcohol use, and binge drinking, whether concurrent or historic  
407 did have either an exacerbating or confounding role within concussion/subconcussion and TES.

408 Further investigation is required to determine the true nature of alcohol use within the disease  
409 progression of TES due to exposure to concussive events. Alcohol use disorder or binge use may  
410 be reactive to the emergence of other psychological or cognitive symptoms, consistent with  
411 described ‘self-medication’ by some within our cohort. It may also be secondary to behavioral  
412 dysregulation as a result of cognitive impairment and TES, or contribute to further cognitive  
413 behavioral impairment. Alcohol use is now interpreted not only as a cause of TBI but a  
414 secondary disorder after TBI, as well as a predictive factor for outcome (47). Although no  
415 patients were diagnosed, those with active alcohol use disorders were provided prophylactic  
416 thiamine towards the prevention of Wernicke-Korsakoff syndrome. An alcohol-related dementia  
417 cannot be excluded as contributing to cognitive impairment, however the presence of comparable  
418 impairment across those with or without a background alcohol history in the current cohort  
419 would favor RC/SCI as a causal factor.

420 One of the central limitations of the study is the self-selection bias of individuals who  
421 volunteered to participate in this behavioral research and the typical characteristics of  
422 participants such as greater years of education and higher IQ scores (48,49). Further, it is likely  
423 that only those concerned with their cognitive ability are seeking treatment from a neurologist.  
424 This self-selection bias may have affected the results. The social desirability of participating in a  
425 research study for many athletes often typically derives from a strong personal interest in the  
426 results of the study (50), with many acknowledging a concomitant desire to contribute to a body  
427 of knowledge that will contribute to both awareness and intervention/prevention of the issue  
428 under investigation. As a result, athletes presenting to behavioral research may not be  
429 representative of the general sporting population. Additionally, the number of concussive  
430 episodes in the sample was largely based on the experience of the patient and their family and is

431 subject to include recall bias. Further investigation would be needed to exclude recall bias and  
432 other noted confounding variables. Concussive events in contact sport have historically been  
433 considered a “normal” aspect of play, being largely under-evaluated and under-declared (51).  
434 This may bias the retrospective recollection of such incidents and some studies have not  
435 investigated history of concussion as a predictor variable as they could not confidently ascertain  
436 the number of concussions experienced by each athlete (15). Cognitive insight was measured  
437 subjectively by both the participant and their carer/spouse. Future research should employ a more  
438 objective measure of cognitive insight. This study was underpowered and as a result, we could  
439 only report on trends in the data and not control for confounding variables, such as alcohol use.

#### 440 **4.1 Conclusion**

441 Within this small retrospective cohort, the criteria for TES were fulfilled and a significant  
442 reduction in episodic memory was identified, with exclusion on clinic/radiological assessment of  
443 other causes. This study confirms 95% confidence that the true population proportion of  
444 diminished insight capacity (one of the hallmark signs of dementia), within a group of post-  
445 concussed or subconcussive individuals aged under 65 that reported to a neurologist falls  
446 between 17.2% and 59.3%, which is significantly higher than the rate of dementia observed  
447 within the general population aged under 65 within Australia. The research team acknowledges  
448 the limitations of most retrospective studies, whereby the significant findings may not account  
449 for other co-related confounding variables. The aim is to conduct further studies to understand  
450 the true nature of these relationships. This means that it is likely that concussive and  
451 subconcussive events may increase the risk of early onset dementia. The plan is to develop  
452 suitably powered large cohort studies assessing the natural history of TES/CTE for the  
453 population from the SNAP-CTE study.

454 **5 Author Contributions**

455 Dr Mobbs had full access to all the data in the study and takes responsibility for the integrity of

456 the data and the accuracy of the data analysis.

457 Study concept and design: All authors.

458 Acquisition, analysis, or interpretation of data: All authors.

459 Drafting of the manuscript: All authors.

460 Critical revision of the manuscript for important intellectual content: All authors.

461 Administrative, technical, or material support: Teunisse

462 Study supervision: Mobbs, Batchelor

463 **6 References**

- 464 1. Reams N, Eckner JT, Almeida AA, Aagesen AL, Giordani B, Paulson H, et al. A Clinical  
465 Approach to the Diagnosis of Traumatic Encephalopathy Syndrome. *JAMA Neurol*  
466 [Internet]. 2016 Jun 1;73(6):743. Available from:  
467 <http://archneur.jamanetwork.com/article.aspx?doi=10.1001/jamaneurol.2015.5015>
- 468 2. Deture MA, Dickson DW. The neuropathological diagnosis of Alzheimer's disease. *Mol*  
469 *Neurodegener*. 2019;14(1):1–18.
- 470 3. McKee AC, Stein TD, Nowinski CJ, Stern RA, Daneshvar DH, Alvarez VE, et al. The  
471 spectrum of disease in chronic traumatic encephalopathy. *Brain* [Internet]. 2013  
472 Jan;136(1):43–64. Available from: [https://academic.oup.com/brain/article-](https://academic.oup.com/brain/article-lookup/doi/10.1093/brain/aws307)  
473 [lookup/doi/10.1093/brain/aws307](https://academic.oup.com/brain/article-lookup/doi/10.1093/brain/aws307)
- 474 4. McKee AC, Cairns NJ, Dickson DW, Folkerth RD, Dirk Keene C, Litvan I, et al. The first  
475 NINDS/NIBIB consensus meeting to define neuropathological criteria for the diagnosis of  
476 chronic traumatic encephalopathy. *Acta Neuropathol* [Internet]. 2016 Jan 14;131(1):75–  
477 86. Available from: <http://link.springer.com/10.1007/s00401-015-1515-z>
- 478 5. Omalu B, Bailes J, Hamilton RL, Kamboh MI, Hammers J, Case M, et al. Emerging  
479 histomorphologic phenotypes of chronic traumatic encephalopathy in american athletes.  
480 *Neurosurgery*. 2011;69(1):173–83.
- 481 6. Ling H, Morris HR, Neal JW, Lees AJ, Hardy J, Holton JL, et al. Mixed pathologies  
482 including chronic traumatic encephalopathy account for dementia in retired association  
483 football (soccer) players. *Acta Neuropathol*. 2017;133(3):337–52.
- 484 7. Buckland ME, Sy J, Szentmariay I, Kullen A, Lee M, Harding A, et al. Chronic traumatic  
485 encephalopathy in two former Australian National Rugby League players. *Acta*

- 486 Neuropathol Commun [Internet]. 2019 Dec 27;7(1):97. Available from:  
487 <https://actaneurocomms.biomedcentral.com/articles/10.1186/s40478-019-0751-1>
- 488 8. Pearce AJ, Sy J, Lee M, Harding A, Mobbs R, Batchelor J, et al. Chronic traumatic  
489 encephalopathy in a former Australian rules football player diagnosed with Alzheimer's  
490 disease. Acta Neuropathol Commun [Internet]. 2020 Dec 26;8(1):23. Available from:  
491 <https://actaneurocomms.biomedcentral.com/articles/10.1186/s40478-020-0895-z>
- 492 9. Love S. Neuropathological investigation of dementia: a guide for neurologists. J Neurol  
493 Neurosurg Psychiatry [Internet]. 2005 Dec 1;76(suppl\_5):v8–14. Available from:  
494 <https://jnnp.bmj.com/lookup/doi/10.1136/jnnp.2005.080754>
- 495 10. Magaki S, Yong WH, Khanlou N, Tung S, Vinters H V. Comorbidity in Dementia:  
496 Update of an Ongoing Autopsy Study. J Am Geriatr Soc [Internet]. 2014 Sep;62(9):1722–  
497 8. Available from: <http://doi.wiley.com/10.1111/jgs.12977>
- 498 11. Fu C, Chute DJ, Farag ES, Garakian J, Cummings JL, Vinters H V. Comorbidity in  
499 Dementia: An Autopsy Study. Arch Pathol Lab Med. 2004;128(1):32–8.
- 500 12. Manley G, Gardner AJ, Schneider KJ, Guskiewicz KM, Bailes J, Cantu RC, et al. A  
501 systematic review of potential long-term effects of sport-related concussion. Br J Sports  
502 Med [Internet]. 2017 Jun;51(12):969–77. Available from:  
503 <https://bjsm.bmj.com/lookup/doi/10.1136/bjsports-2017-097791>
- 504 13. Gallo V, Motley K, Kemp SPT, Mian S, Patel T, James L, et al. Concussion and long-term  
505 cognitive impairment among professional or elite sport-persons: a systematic review. J  
506 Neurol Neurosurg Psychiatry [Internet]. 2020 May;91(5):455–68. Available from:  
507 <https://jnnp.bmj.com/lookup/doi/10.1136/jnnp-2019-321170>
- 508 14. Hart J, Kraut MA, Womack KB, Strain J, Didehbani N, Bartz E, et al. Neuroimaging of

- 509 cognitive dysfunction and depression in aging retired National Football League players: A  
510 cross-sectional study. *JAMA Neurol* [Internet]. 2013 Mar 1 [cited 2013 Sep  
511 24];70(3):326–35. Available from: <http://www.ncbi.nlm.nih.gov/pubmed/23303193>
- 512 15. Baker JG, Leddy JJ, Hinds AL, Haider MN, Shucard J, Sharma T, et al. An Exploratory  
513 Study of Mild Cognitive Impairment of Retired Professional Contact Sport Athletes. *J*  
514 *Head Trauma Rehabil*. 2018;33(5):E16–23.
- 515 16. Guskiewicz KM, Marshall SW, Bailes J, McCrea M, Cantu RC, Randolph C, et al.  
516 Association between Recurrent Concussion and Late-Life Cognitive Impairment in  
517 Retired Professional Football Players. *Neurosurgery*. 2005;57(4):719–26.
- 518 17. Randolph C, Karantzoulis S, Guskiewicz K. Prevalence and characterization of mild  
519 cognitive impairment in retired national football league players. *J Int Neuropsychol Soc*  
520 [Internet]. 2013 Sep [cited 2013 Sep 11];19(8):873–80. Available from:  
521 <http://www.ncbi.nlm.nih.gov/pubmed/23902607>
- 522 18. Seichepine DR, Stamm JM, Daneshvar DH, Riley DO, Baugh CM, Gavett BE, et al.  
523 Profile of Self-Reported Problems with Executive Functioning in College and Professional  
524 Football Players. *J Neurotrauma* [Internet]. 2013 Jul 15;30(14):1299–304. Available from:  
525 <http://www.liebertpub.com/doi/10.1089/neu.2012.2690>
- 526 19. Hume PA, Theadom A, Lewis GN, Quarrie KL, Brown SR, Hill R, et al. A Comparison of  
527 Cognitive Function in Former Rugby Union Players Compared with Former Non-Contact-  
528 Sport Players and the Impact of Concussion History. *Sport Med*. 2017;47(6):1209–20.
- 529 20. Ford JH, Giovanello KS, Guskiewicz KM. Episodic memory in former professional  
530 football players with a history of concussion: An event-related functional neuroimaging  
531 study. *J Neurotrauma* [Internet]. 2013 Oct 15 [cited 2013 Oct 12];30(20):1683–701.



- 532 Available from: <http://www.ncbi.nlm.nih.gov/pubmed/23679098>
- 533 21. Ratcliff R, Thapar A, McKoon G. Effects of aging and IQ on item and associative  
534 memory. *J Exp Psychol Gen.* 2011;140(3):464–87.
- 535 22. Healey MK, Miyake A. The role of attention during retrieval in working-memory span: A  
536 dual-task study. *Q J Exp Psychol.* 2009;62(4):733–45.
- 537 23. Wright MJ, Monti MM, Lutkenhoff ES, Hardy DJ, Litvin PY, Kelly DF, et al. Memory in  
538 repeat sports-related concussive injury and single-impact traumatic brain injury. *Brain Inj*  
539 [Internet]. 2020 Sep 29;00(00):1–8. Available from:  
540 <https://doi.org/10.1080/02699052.2020.1825806>
- 541 24. Strain JF, Womack KB, Didehbani N, Spence JS, Conover H, Hart J, et al. Imaging  
542 correlates of memory and concussion history in retired National Football League athletes.  
543 *JAMA Neurol.* 2015;72(7):773–80.
- 544 25. Tremblay S, De Beaumont L, Henry LC, Boulanger Y, Evans AC, Bourgouin P, et al.  
545 Sports concussions and aging: A neuroimaging investigation. *Cereb Cortex* [Internet].  
546 2013 May [cited 2013 Sep 19];23(5):1159–66. Available from:  
547 <http://www.ncbi.nlm.nih.gov/pubmed/22581847>
- 548 26. De Beaumont L, Thoret H, Mongeon D, Messier J, Leclerc S, Tremblay S, et al. Brain  
549 function decline in healthy retired athletes who sustained their last sports concussion in  
550 early adulthood. *Brain.* 2009;132(3):695–708.
- 551 27. Pearce AJ, Hoy K, Rogers MA, Corp DT, Maller JJ, Drury HGK, et al. The Long-Term  
552 Effects of Sports Concussion on Retired Australian Football Players: A Study Using  
553 Transcranial Magnetic Stimulation. *J Neurotrauma* [Internet]. 2014 Jul;31(13):1139–45.  
554 Available from: <http://www.liebertpub.com/doi/10.1089/neu.2013.3219>

- 555 28. Pearce AJ, Rist B, Fraser CL, Cohen A, Maller JJ. Neurophysiological and cognitive  
556 impairment following repeated sports concussion injuries in retired professional rugby  
557 league players. *Brain Inj* [Internet]. 2018 Mar 21;32(4):498–505. Available from:  
558 <https://doi.org/10.1080/02699052.2018.1430376>
- 559 29. Mendez MF, Shapira JS. Loss of insight and functional neuroimaging in frontotemporal  
560 dementia. *J Neuropsychiatry Clin Neurosci*. 2005;17(3):413–6.
- 561 30. McKee AC, Cantu RC, Nowinski CJ, Hedley-Whyte ET, Gavett BE, Budson AE, et al.  
562 Chronic Traumatic Encephalopathy in athletes: Progressive tauopathy after repetitive head  
563 injury. *J Neuropathol Exp Neurol* [Internet]. 2009 Jul 1;68(7):709–35. Available from:  
564 <https://academic.oup.com/jnen/article-lookup/doi/10.1097/NEN.0b013e3181a9d503>
- 565 31. Gavett BE, Cantu RC, Shenton M, Lin AP, Nowinski CJ, McKee AC, et al. Clinical  
566 appraisal of chronic traumatic encephalopathy. *Curr Opin Neurol* [Internet]. 2011  
567 Dec;24(6):525–31. Available from: <http://journals.lww.com/00019052-201112000-00003>
- 568 32. Levy S, Gansler D, Huey E, Wassermann E, Grafman J. Assessment of patient self-  
569 awareness and related neural correlates in frontotemporal dementia and corticobasal  
570 syndrome. *Arch Clin Neuropsychol*. 2018;33(5):519–29.
- 571 33. Hurt CS, Banerjee S, Tunnard C, Whitehead DL, Tsolaki M, Mecocci P, et al. Insight,  
572 cognition and quality of life in Alzheimer’s disease. *J Neurol Neurosurg Psychiatry*.  
573 2010;81(3):331–6.
- 574 34. Kuruppu DK, Matthews BR. Young-onset dementia. Vol. 33, *Seminars in Neurology*.  
575 2013. 365–385 p.
- 576 35. Seraji-Bzorgzad N, Paulson H, Heidebrink J. Neurologic examination in the elderly. In:  
577 Dekosky ST, Asthana SBT-H of CN, editors. *Geriatric Neurology* [Internet]. Elsevier;

- 578 2019. p. 73–88. Available from:  
579 <http://www.sciencedirect.com/science/article/pii/B9780128047668000054>
- 580 36. Montenigro PH, Baugh CM, Daneshvar DH, Mez J, Budson AE, Au R, et al. Clinical  
581 subtypes of chronic traumatic encephalopathy: literature review and proposed research  
582 diagnostic criteria for traumatic encephalopathy syndrome. *Alzheimers Res Ther*  
583 [Internet]. 2014 Oct 24;6(5–8):68. Available from:  
584 <http://alzres.biomedcentral.com/articles/10.1186/s13195-014-0068-z>
- 585 37. Pearson Inc. *Advanced Clinical Solutions*. 2009.
- 586 38. Dyer B, Daniel M, Michael P. The relationship between intelligence and memory  
587 measures in a clinical sample. *Arch Clin Neuropsychol*. 2011;26(6):548.
- 588 39. Australian Institute of Health and Welfare. *Dementia* [Internet]. 2020 [cited 2020 Nov 6].  
589 Available from: <https://www.aihw.gov.au/reports/australias-health/dementia>
- 590 40. Wechsler D. *WISC-V: Technical and interpretive manual*. Bloomington, MN: Pearson;  
591 2014.
- 592 41. Lange RT, Chelune GJ, Tulsky DS. Development of WAIS-III General Ability Index  
593 minus WMS-III memory discrepancy scores. *Clin Neuropsychol*. 2006;20(3):382–95.
- 594 42. Australian Bureau of Statistics. *National, state and territory population, March 2020* |  
595 [Internet]. 2020 [cited 2020 Nov 6]. Available from:  
596 [https://www.abs.gov.au/statistics/people/population/national-state-and-territory-](https://www.abs.gov.au/statistics/people/population/national-state-and-territory-population/latest-release#data-downloads-data-cubes)  
597 [population/latest-release#data-downloads-data-cubes](https://www.abs.gov.au/statistics/people/population/national-state-and-territory-population/latest-release#data-downloads-data-cubes)
- 598 43. Hodges JR, Larner AJ. Addenbrooke’s Cognitive Examinations: ACE, ACE-R, ACE-III,  
599 ACEapp, and M-ACE. In: Larner AJ, editor. *Cognitive Screening Instruments: A Practical*  
600 *Approach* [Internet]. Cham: Springer International Publishing; 2017. p. 109–37. Available

- 601 from: [https://doi.org/10.1007/978-3-319-44775-9\\_6](https://doi.org/10.1007/978-3-319-44775-9_6)
- 602 44. Stern RA, Daneshvar DH, Baugh CM, Seichepine DR, Montenegro PH, Riley DO, et al.  
603 Clinical presentation of chronic traumatic encephalopathy. *Neurology* [Internet]. 2013 Sep  
604 24;81(13):1122–9. Available from:  
605 <http://www.neurology.org/cgi/doi/10.1212/01.wnl.0000457270.13076.80>
- 606 45. Unsworth N, Brewer GA, Spillers GJ. Working memory capacity and retrieval from long-  
607 term memory: The role of controlled search. *Mem Cogn*. 2013;41(2):242–54.
- 608 46. Rafferty J, Ranson C, Oatley G, Mostafa M, Mathema P, Crick T, et al. On average, a  
609 professional rugby union player is more likely than not to sustain a concussion after 25  
610 matches. *Br J Sports Med*. 2019;53(15):969–73.
- 611 47. Weil ZM, Corrigan JD, Karelina K. Alcohol Use Disorder and Traumatic Brain Injury.  
612 *Alcohol Res*. 2018;39(2):171–80.
- 613 48. Rosenthal R, Rosnow R. *The volunteer subject*. John Wiley & Sons; 1975.
- 614 49. Oswald LM, Wand GS, Zhu S, Selby V. Volunteerism and self-selection bias in human  
615 positron emission tomography neuroimaging research. *Brain Imaging Behav* [Internet].  
616 2013 Jun 30;7(2):163–76. Available from: [http://link.springer.com/10.1007/s11682-012-](http://link.springer.com/10.1007/s11682-012-9210-3)  
617 [9210-3](http://link.springer.com/10.1007/s11682-012-9210-3)
- 618 50. Lebrun F, MacNamara À, Rodgers S, Collins D. Learning From Elite Athletes’  
619 Experience of Depression. *Front Psychol* [Internet]. 2018 Oct 26;9(OCT):1–11. Available  
620 from: <https://www.frontiersin.org/article/10.3389/fpsyg.2018.02062/full>
- 621 51. Torres DM, Galetta KM, Phillips HW, Dziemianowicz EMS, Wilson JA, Dorman ES, et  
622 al. Sports-related concussion Anonymous survey of a collegiate cohort. *Neurol Clin Pract*.  
623 2013;3(4):279–87.
